# Supplementary material for: Learning contextual gene set interaction networks of cancer with condition specificity
Source: PubMed Central journal article supplement (PMC3644282; doi:10.1186/1471-2164-14-110), 2013-02-19

(A)

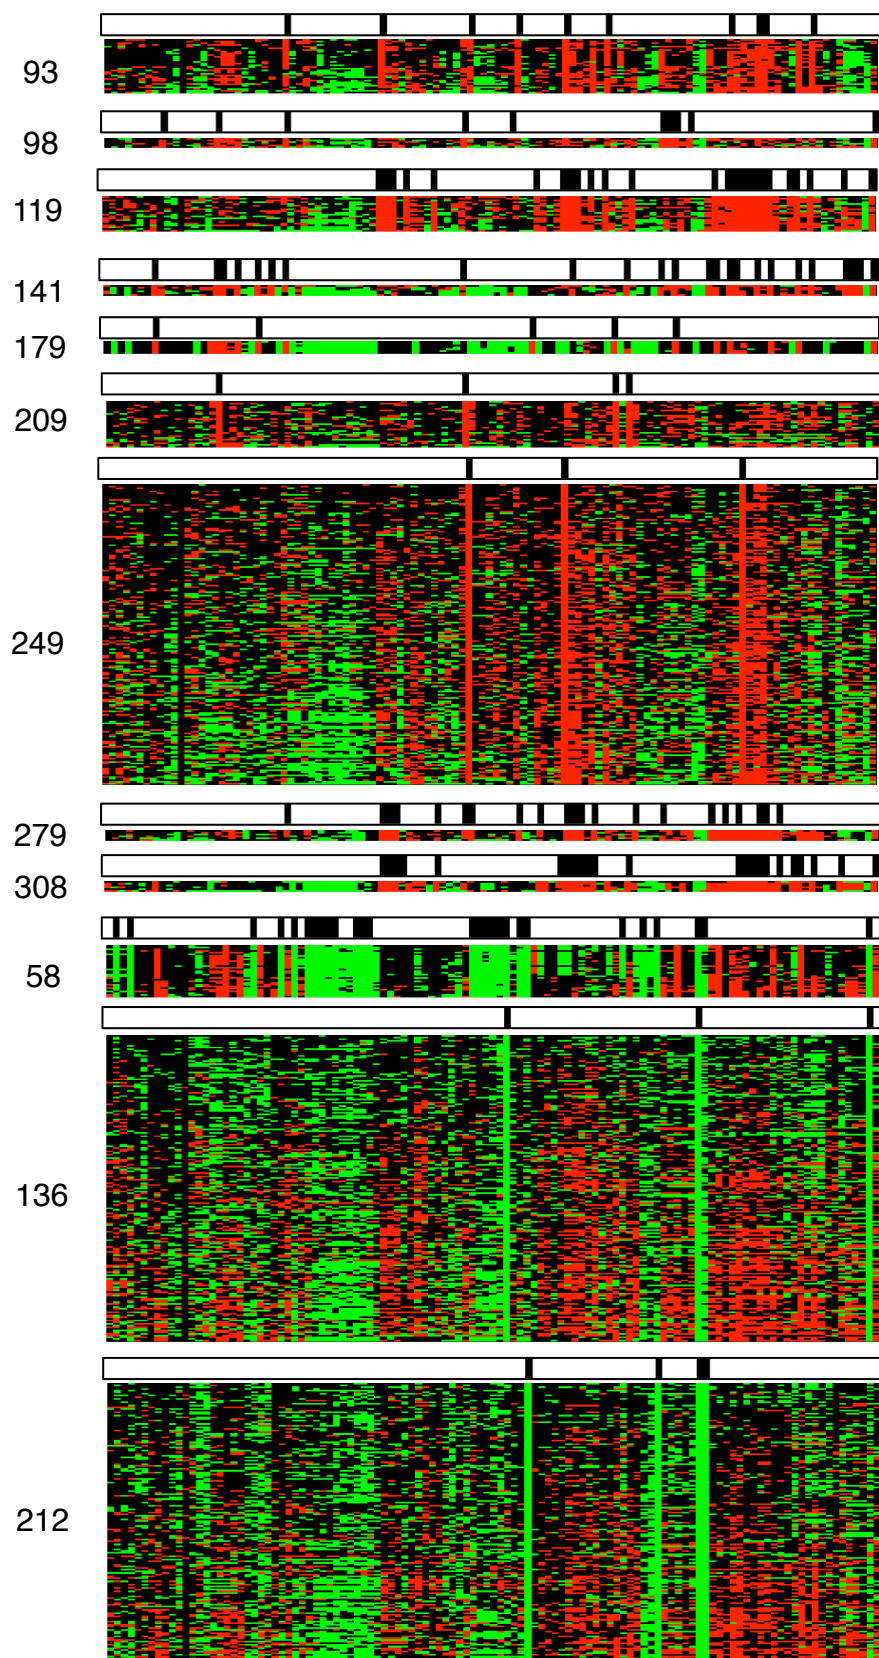

(B)

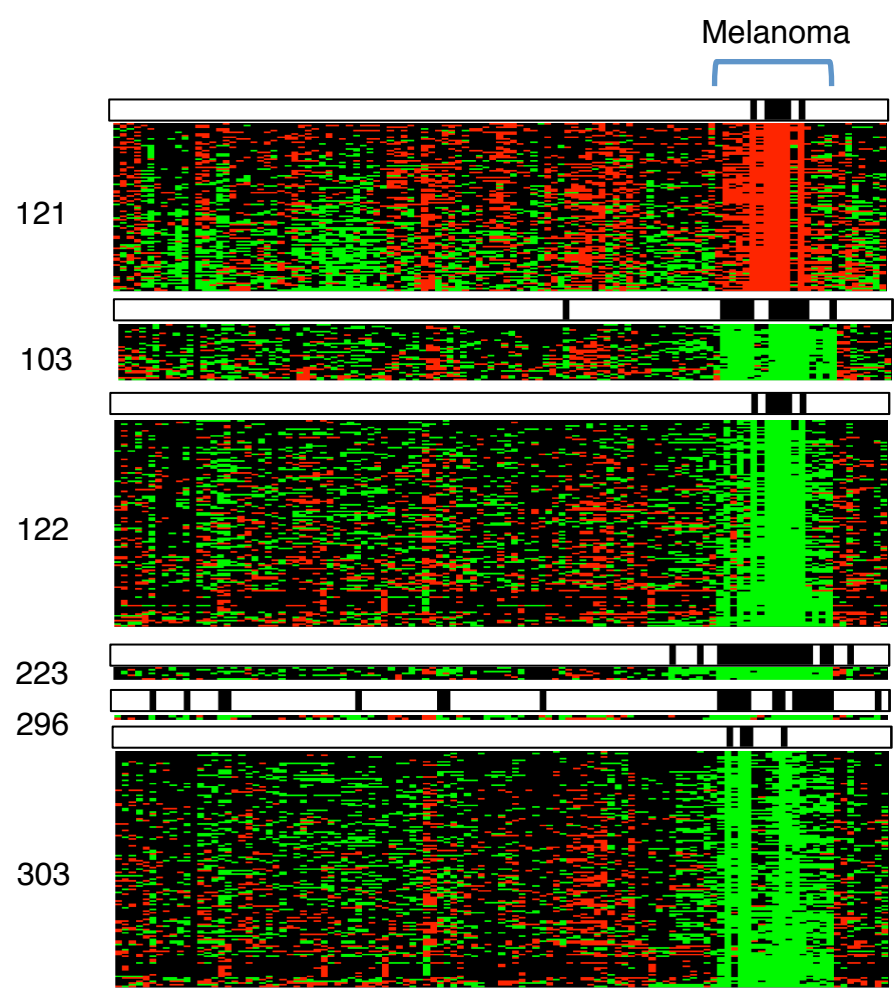

(C)

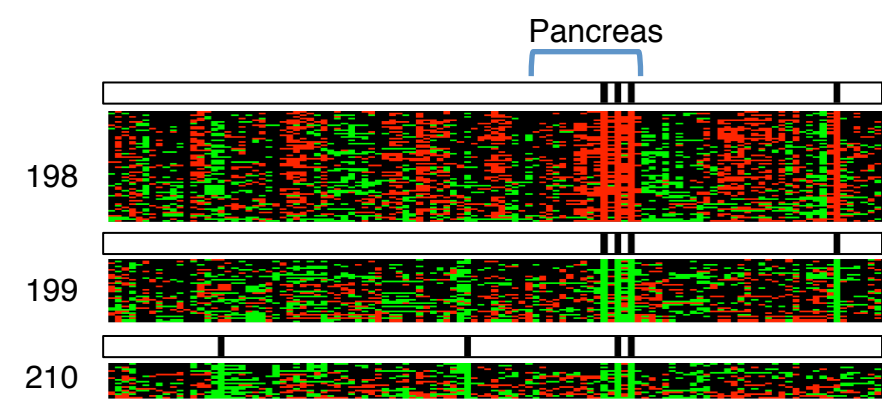

(D)

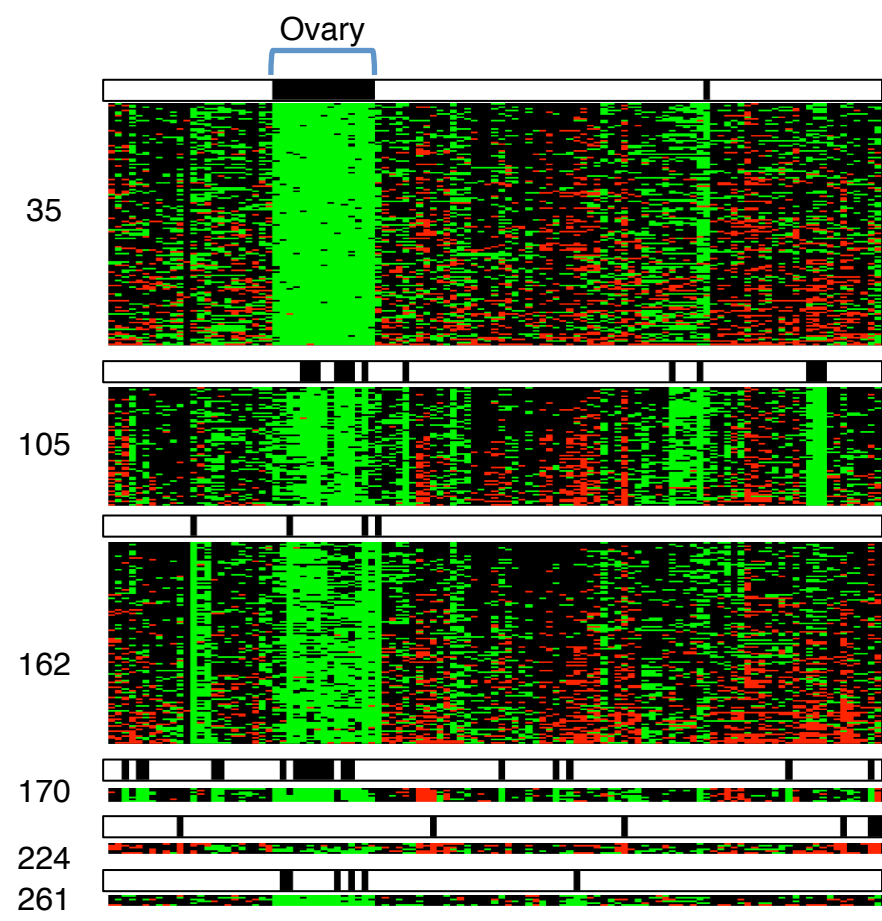

(E)

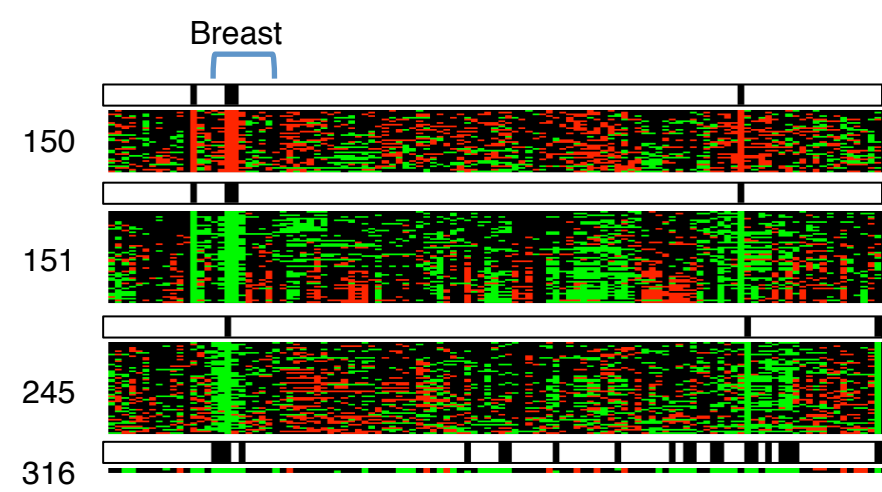

Supplement: 1471-2164-14-110-S4.pdf [file 1471-2164-14-110-S4.pdf]
