# Supplementary material for: Learning contextual gene set interaction networks of cancer with condition specificity
Source: PubMed Central journal article supplement (PMC3644282; doi:10.1186/1471-2164-14-110), 2013-02-19
Supplement: 1471-2164-14-110-S5.pdf [file 1471-2164-14-110-S5.pdf]

Contextual gene set

Classical

Mesenchymal

Neural

Proneural

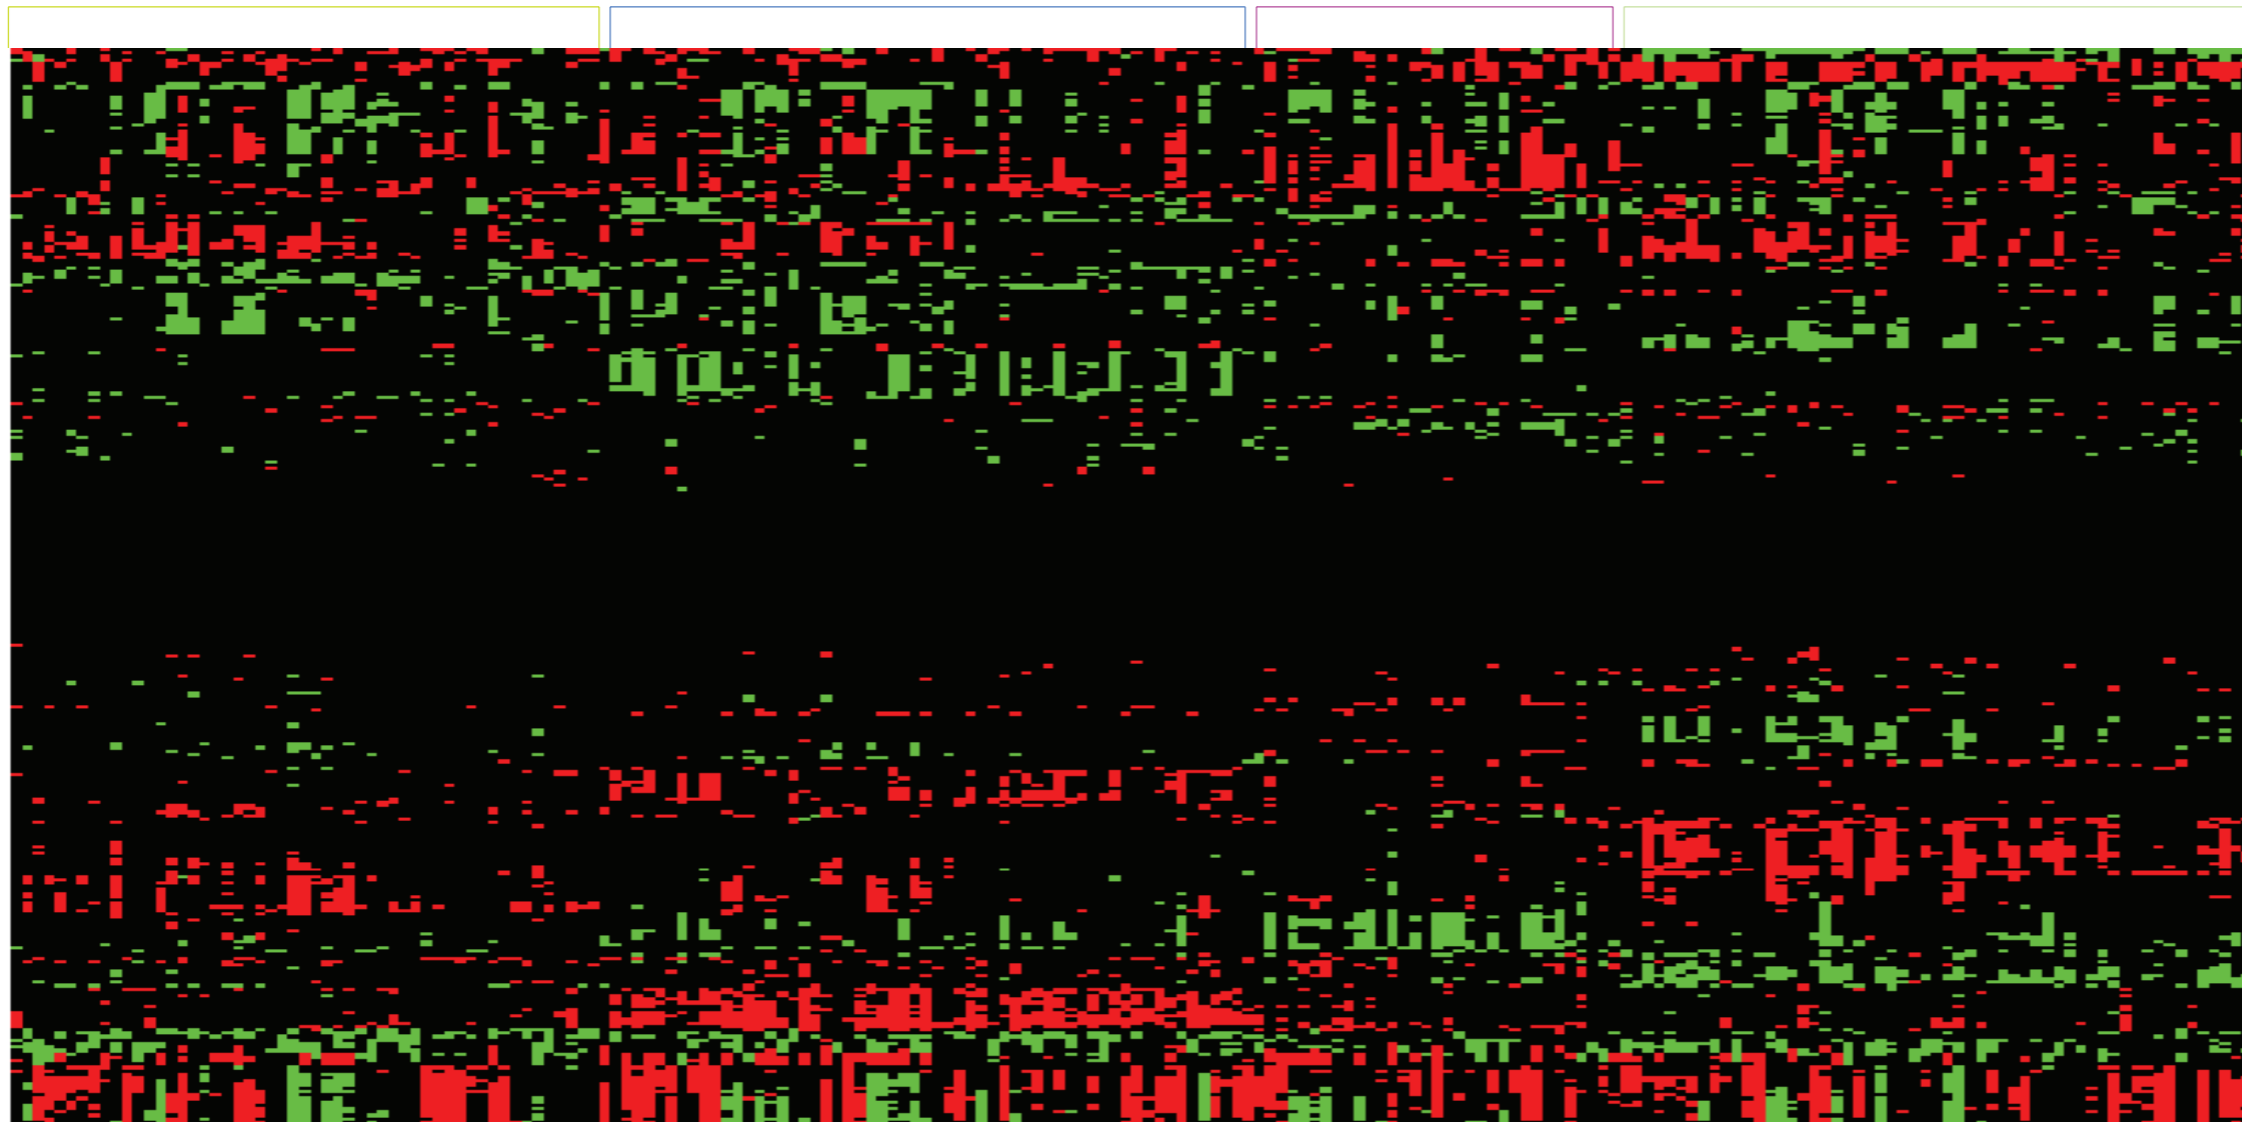

20

40

60

80

100  
Patient

120

140

160

180

200

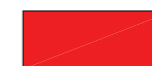

Over-expressed

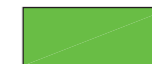

Under-expressed
