# Supplementary material for: Learning contextual gene set interaction networks of cancer with condition specificity
Source: PubMed Central journal article supplement (PMC3644282; doi:10.1186/1471-2164-14-110), 2013-02-19

**(A)**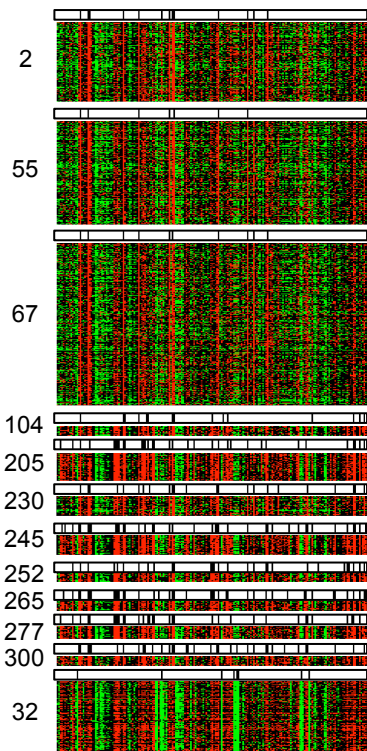**(B)**

Classical

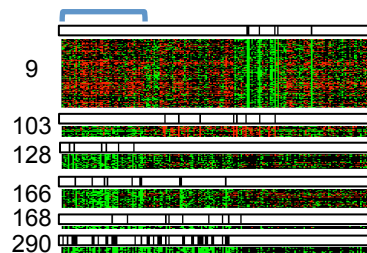**(C)**

Classical

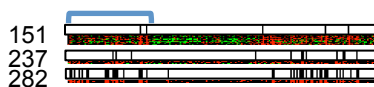**(D)**

Mesenchymal

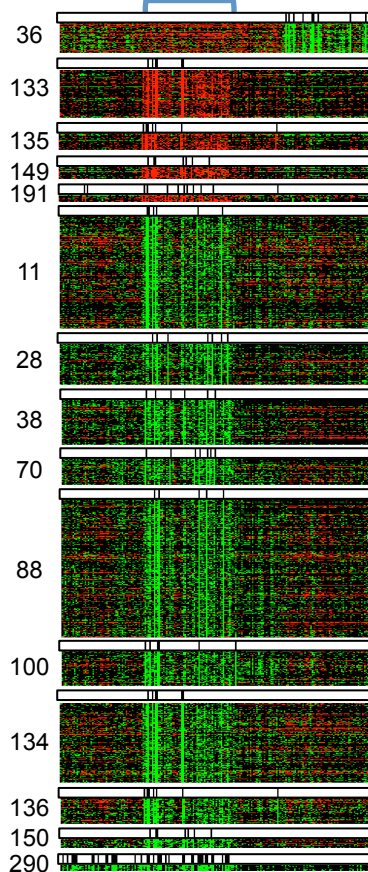**(E)**

Neural

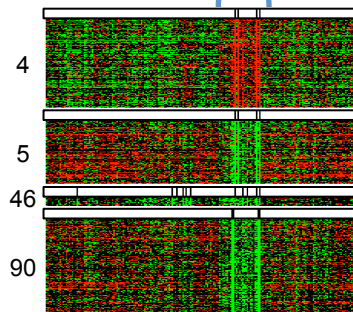**(F)**

Proneural

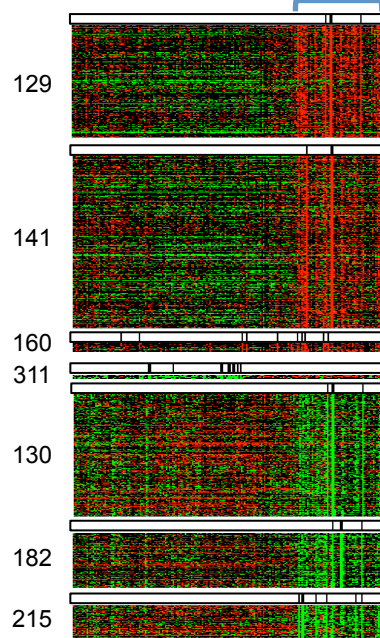**(G)**

Proneural

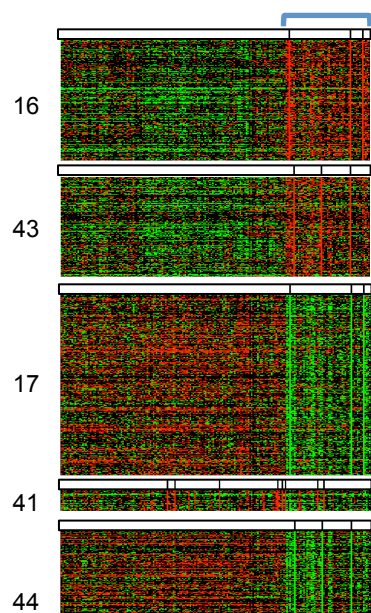

Supplement: 1471-2164-14-110-S6.pdf [file 1471-2164-14-110-S6.pdf]
